# Supplementary material
Source: PubMed Central journal article supplement (PMC9135949)
Supplement: 11357_2021_382_MOESM1_ESM.pdf [file 11357_2021_382_MOESM1_ESM.pdf]

## SUPPLEMENTAL MATERIAL

**Article title: Using lipid profiling to better characterize metabolic differences in *apolipoprotein E (APOE)* genotype among community-dwelling older Black men**

Megan M. Marron<sup>1</sup>, Steven C. Moore<sup>2</sup>, Stacy G. Wendell<sup>3</sup>, Robert M. Boudreau<sup>1</sup>, Iva Miljkovic<sup>1</sup>, Akira Sekikawa<sup>1</sup>, Anne B. Newman<sup>1,4</sup>

1. Department of Epidemiology, Graduate School of Public Health, University of Pittsburgh, Pittsburgh, PA, USA.
2. Division of Cancer Epidemiology, and Genetics, National Cancer Institute, Rockville, MD, USA.
3. Departments of Pharmacology and Chemical Biology and Clinical and Translational Science, University of Pittsburgh, Pittsburgh, Pennsylvania, USA.
4. Departments of Medicine and Clinical and Translational Science, University of Pittsburgh, Pittsburgh, PA, USA.

Address Correspondence to: Anne B. Newman, MD, MPH, Department of Epidemiology, Graduate School of Public Health, University of Pittsburgh, Pittsburgh, PA; 130 DeSoto St. 5127 Public Health, Pittsburgh, PA 15261. E-mail: newmana@edc.pitt.edu.

Supplemental Table 1a. Prevalence of *APOE* genotype among n=292 Health ABC Black men with metabolomics

|                                         | <b>Black men with metabolomics data<br/>(n=292)</b> |
|-----------------------------------------|-----------------------------------------------------|
| <b><i>APOE</i> genotypes:</b>           |                                                     |
| ε2,ε2                                   | 3 (1%)                                              |
| ε2,ε3                                   | 55 (19%)                                            |
| ε2,ε4                                   | 14 (5%)                                             |
| ε3,ε3                                   | 137 (47%)                                           |
| ε3,ε4                                   | 74 (25%)                                            |
| ε4,ε4                                   | 9 (3%)                                              |
| <b><i>APOE</i> genotype categories:</b> |                                                     |
| ε2 carrier (ε2,ε2 or ε2,ε3)             | 58 (20%)                                            |
| ε3 homozygote (ε3,ε3)                   | 137 (47%)                                           |
| ε4 carrier (ε3,ε4 or ε4,ε4)             | 83 (28%)                                            |
| ε2,ε4 carrier                           | 14 (5%)                                             |

Supplemental Table 1b. Prevalence of *APOE* genotype among all Health ABC participants by race and gender

|                                         | <b>All Health ABC participants with <i>APOE</i> genotype</b> |                                |                              |                                | <b>Overall p-value<br/>Pairwise comparisons</b> |
|-----------------------------------------|--------------------------------------------------------------|--------------------------------|------------------------------|--------------------------------|-------------------------------------------------|
|                                         | <b>Black men<br/>(n=515)</b>                                 | <b>Black women<br/>(n=683)</b> | <b>White men<br/>(n=897)</b> | <b>White women<br/>(n=814)</b> |                                                 |
| <b><i>APOE</i> genotypes:</b>           |                                                              |                                |                              |                                | p<.0001<br>-----                                |
| ε2,ε2                                   | 5 (1%)                                                       | 8 (1%)                         | 8 (0.9%)                     | 5 (0.6%)                       |                                                 |
| ε2,ε3                                   | 98 (19%)                                                     | 85 (12%)                       | 114 (13%)                    | 98 (12%)                       | BM>WW,BW,WM                                     |
| ε2,ε4                                   | 23 (4%)                                                      | 33 (5%)                        | 17 (2%)                      | 11 (1%)                        | BW,BM>WM,WW                                     |
| ε3,ε3                                   | 242 (47%)                                                    | 328 (48%)                      | 558 (62%)                    | 523 (64%)                      | BM,BW<WM,WW                                     |
| ε3,ε4                                   | 133 (26%)                                                    | 203 (30%)                      | 185 (21%)                    | 168 (21%)                      | BW,BM>WM,WW                                     |
| ε4,ε4                                   | 14 (3%)                                                      | 26 (4%)                        | 15 (2%)                      | 9 (1%)                         | BW>WM,WW; BM>WW                                 |
| <b><i>APOE</i> genotype categories:</b> |                                                              |                                |                              |                                | p<.0001                                         |
| ε2 carrier (ε2,ε2 or ε2,ε3)             | 103 (20%)                                                    | 93 (14%)                       | 122 (14%)                    | 103 (13%)                      | BM>WW,BW,WM                                     |
| ε3 homozygote (ε3,ε3)                   | 242 (47%)                                                    | 328 (48%)                      | 558 (62%)                    | 523 (64%)                      | BM,BW<WM,WW                                     |
| ε4 carrier (ε3,ε4 or ε4,ε4)             | 147 (29%)                                                    | 229 (34%)                      | 200 (22%)                    | 177 (22%)                      | BW,BM>WM,WW                                     |
| ε2,ε4 carrier                           | 23 (4%)                                                      | 33 (5%)                        | 17 (2%)                      | 11 (1%)                        | BW,BM>WM,WW                                     |

BM=Black men; BW=Black women; WM=White men; WW=White women.

Supplemental Table 2. Information on platform and categorization of the 350 metabolites available among the N=319 Health ABC Black men, and which metabolites were considered for this report

| <b>Considered for this report</b> | <b><u>189 total metabolites detected using lipid profiling method</u></b>                                                                                                                                                                                                                                                                                                                                                                                 | <b><u>68 total metabolites detected using negative ion mode polar metabolite profiling method</u></b>                                                                                                                                                                                                                                                                                                                                                                                                                                                                                                                                                                                                                                                                                                                                                                                       | <b><u>93 total metabolites detected using positive ion mode, polar metabolite profiling method</u></b>                                                                                                                                                                                                                                                                                                                                                                                                                                                                                                                                                                                                                                                                                                                                                                                                                                                        |
|-----------------------------------|-----------------------------------------------------------------------------------------------------------------------------------------------------------------------------------------------------------------------------------------------------------------------------------------------------------------------------------------------------------------------------------------------------------------------------------------------------------|---------------------------------------------------------------------------------------------------------------------------------------------------------------------------------------------------------------------------------------------------------------------------------------------------------------------------------------------------------------------------------------------------------------------------------------------------------------------------------------------------------------------------------------------------------------------------------------------------------------------------------------------------------------------------------------------------------------------------------------------------------------------------------------------------------------------------------------------------------------------------------------------|---------------------------------------------------------------------------------------------------------------------------------------------------------------------------------------------------------------------------------------------------------------------------------------------------------------------------------------------------------------------------------------------------------------------------------------------------------------------------------------------------------------------------------------------------------------------------------------------------------------------------------------------------------------------------------------------------------------------------------------------------------------------------------------------------------------------------------------------------------------------------------------------------------------------------------------------------------------|
| Yes                               | <p>The following 189 metabolites were considered for this analysis:</p> <ul style="list-style-type: none"> <li>• 56 TAG</li> <li>• 23 PC</li> <li>• 15 DAG</li> <li>• 13 CE</li> <li>• 13 PE plasmalogen</li> <li>• 13 PC plasmalogen</li> <li>• 12 PE</li> <li>• 11 SM</li> <li>• 10 LPC</li> <li>• 6 LPE</li> <li>• 5 PI</li> <li>• 4 Ceramide (d18:1)</li> <li>• 4 MAG</li> <li>• 2 PS plasmalogen</li> <li>• 1 PS</li> <li>• 1 Sphingosine</li> </ul> | <p>The following 8 metabolites were considered for this analysis:</p> <ul style="list-style-type: none"> <li>• 5 bile acids: <ul style="list-style-type: none"> <li>➢ Glycocholate, cholate, chenodeoxycholate, glycodeoxycholate, taurodeoxycholate</li> </ul> </li> <li>• 2 fatty acids: <ul style="list-style-type: none"> <li>➢ Adipate, 3-methyladipate</li> </ul> </li> <li>• 1 glycerophosphates <ul style="list-style-type: none"> <li>➢ Alpha-glycerophosphate</li> </ul> </li> </ul>                                                                                                                                                                                                                                                                                                                                                                                              | <p>The following 32 metabolites were considered for this analysis:</p> <ul style="list-style-type: none"> <li>• 28 acylcarnitines: <ul style="list-style-type: none"> <li>➢ C10 carnitine; C10:2 carnitine; C12 carnitine; C12:1 carnitine; C14 carnitine; C14:1 carnitine; C14:2 carnitine; C16 carnitine; C18 carnitine; C18:1 carnitine; C18:2 carnitine; C2 carnitine; C20 carnitine; C20:4 carnitine; C26 carnitine; C3 carnitine; C4 carnitine; C5 carnitine; C5:1 carnitine; C6 carnitine; C8 carnitine; C16-OH carnitine; C18:1-OH carnitine; C3-DC-CH3 carnitine; C4-OH carnitine; C5-DC carnitine; C7 carnitine; C9 carnitine;</li> </ul> </li> <li>• Free carnitine</li> <li>• 1 glycerophosphocholine: <ul style="list-style-type: none"> <li>➢ Alpha-glycerophosphocholine</li> </ul> </li> <li>• 2 fatty acids: <ul style="list-style-type: none"> <li>➢ Butyrobetaine; mevalonic acid</li> </ul> </li> </ul>                                   |
| No                                | 0 metabolites                                                                                                                                                                                                                                                                                                                                                                                                                                             | <p>The following 60 metabolites were excluded from this analysis:</p> <ul style="list-style-type: none"> <li>• PEP; quinolinate; sorbitol; sucrose; 4-hydroxymandelate; ADP; benzoate; gentisate; hippurate; homogentisate; hydroxyphenylacetate; salicylurate; AMP; cAMP; GDP; GMP; IMP; inosine; UDP; UDP-galactose; uridine; 2-aminoadipate; 2-hydroxyglutarate; aconitate; alpha-hydroxybutyrate; alpha-ketoglutarate; beta-hydroxybutyrate; citrate; cystathionine; fumarate; glutathione oxidized; indoxylsulfate; isocitrate; lactate; malate; methylmalonate; oxalate; phosphocreatine; propionate; pyruvate; 2-phosphoglycerate; 6-phosphogluconate; glucose; glucuronate; hexose monophosphate; inositol; lactose; MDA; pantothenate; kynurenine; succinate; 4-pyridoxate; adenine; hypoxanthine; indole-3-propionate; orotate; uracil; xanthurenate; urate; xanthine.</li> </ul> | <p>The following 61 metabolites were excluded from this analysis:</p> <ul style="list-style-type: none"> <li>• Serotonin; creatinine; 3-hydroxyanthranilic acid; anthranilic acid; thyroxine; adenosine; xanthosine; 5-aminolevulinic acid; acetylglycine; adma; alanine; aminoisobutyric acid; anserine; arginine; asparagine; beta-alanine; betaine; citrulline; creatine; dimethylglycine; GABA; glutamate; glutamine; glycine; histidine; homocysteine; hydroxyproline; isoleucine; leucine; lysine; methionine; methionine sulfoxide; N-carbamoyl-beta-alanine; nmma; ornithine; pipercolic acid; proline; pyroglutamic acid; sarcosine; sdma; serine; taurine; threonine; tyrosine; valine; phenylalanine; phosphoethanolamine; trimethylamine-N-oxide; 1-methylnicotinamide; 5-hydroxytryptophan; allantoin; cytosine; kynurenic acid; niacinamide; tryptophan; cotinine; 1-methylhistamine; acetylcholine; choline; histamine; putrescine.</li> </ul> |

Supplemental Table 3. Mean (standard deviation) of 222 metabolites by APOE among Health ABC Black men, organized by significance

| Mean (standard error)                                                                   | APOE genotype categories    |                                 |                             |                                        | Overall p-value** |
|-----------------------------------------------------------------------------------------|-----------------------------|---------------------------------|-----------------------------|----------------------------------------|-------------------|
|                                                                                         | $\epsilon 2$ carrier (n=58) | $\epsilon 3$ homozygous (n=137) | $\epsilon 4$ carrier (n=83) | $\epsilon 2\epsilon 4$ carriers (n=14) |                   |
| Metabolites:                                                                            |                             |                                 |                             |                                        |                   |
| Monoacylglycerol (MAG):                                                                 |                             |                                 |                             |                                        |                   |
| C16:1 MAG                                                                               | 0.06 (0.13)                 | -0.09 (0.09)                    | 0.04 (0.11)                 | 0.36 (0.27)                            | 0.0002            |
| C14:1 MAG                                                                               | -0.32 (0.11)                | 0.13 (0.09)                     | 0.06 (0.11)                 | -0.25 (0.22)                           | 0.004             |
| C22:1 MAG                                                                               | -0.26 (0.13)                | 0.18 (0.08)                     | -0.09 (0.11)                | -0.15 (0.26)                           | 0.01              |
| C18:0 MAG                                                                               | -0.06 (0.12)                | 0.09 (0.09)                     | -0.06 (0.09)                | -0.24 (0.31)                           | 0.47              |
| Cholesteryl ester (CE):                                                                 |                             |                                 |                             |                                        |                   |
| C18:2 CE                                                                                | -0.39 (0.13)                | 0.10 (0.08)                     | 0.12 (0.11)                 | -0.12 (0.26)                           | 0.003             |
| C16:0 CE                                                                                | -0.35 (0.13)                | 0.04 (0.08)                     | 0.21 (0.11)                 | -0.15 (0.26)                           | 0.004             |
| C20:3 CE                                                                                | -0.36 (0.13)                | 0.16 (0.08)                     | 0.03 (0.11)                 | -0.20 (0.26)                           | 0.004             |
| C20:4 CE                                                                                | -0.32 (0.13)                | 0.09 (0.08)                     | 0.09 (0.11)                 | -0.10 (0.27)                           | 0.02              |
| C22:6 CE                                                                                | -0.30 (0.13)                | 0.08 (0.08)                     | 0.13 (0.11)                 | -0.28 (0.26)                           | 0.02              |
| C22:5 CE                                                                                | -0.29 (0.13)                | 0.05 (0.08)                     | 0.12 (0.11)                 | -0.009 (0.27)                          | 0.04              |
| C18:1 CE                                                                                | -0.28 (0.13)                | 0.05 (0.08)                     | 0.13 (0.11)                 | -0.11 (0.27)                           | 0.05              |
| C22:4 CE                                                                                | -0.24 (0.13)                | 0.10 (0.09)                     | -0.02 (0.11)                | 0.11 (0.27)                            | 0.10              |
| C18:3 CE                                                                                | -0.21 (0.13)                | 0.08 (0.08)                     | -0.06 (0.11)                | 0.40 (0.27)                            | 0.16              |
| C20:5 CE                                                                                | -0.20 (0.13)                | 0.03 (0.09)                     | 0.04 (0.11)                 | 0.27 (0.27)                            | 0.27              |
| C16:1 CE                                                                                | -0.08 (0.13)                | 0.04 (0.09)                     | 0.005 (0.11)                | -0.11 (0.27)                           | 0.73              |
| C18:0 CE                                                                                | 0.03 (0.13)                 | -0.03 (0.09)                    | 0.05 (0.11)                 | -0.14 (0.27)                           | 0.86              |
| Triacylglycerol (TAG) that consist mostly of polyunsaturated fatty acids:               |                             |                                 |                             |                                        |                   |
| C58:11 TAG                                                                              | 0.27 (0.13)                 | -0.05 (0.08)                    | -0.17 (0.11)                | 0.39 (0.26)                            | 0.03              |
| C52:7 TAG                                                                               | 0.27 (0.13)                 | -0.05 (0.08)                    | -0.15 (0.11)                | 0.23 (0.27)                            | 0.04              |
| C58:9 TAG                                                                               | 0.28 (0.13)                 | -0.05 (0.08)                    | -0.13 (0.11)                | 0.13 (0.27)                            | 0.04              |
| C58:10 TAG                                                                              | 0.27 (0.13)                 | -0.05 (0.08)                    | -0.15 (0.11)                | 0.25 (0.27)                            | 0.04              |
| C56:9 TAG                                                                               | 0.27 (0.13)                 | -0.04 (0.08)                    | -0.16 (0.11)                | 0.25 (0.27)                            | 0.04              |
| C56:7 TAG                                                                               | 0.29 (0.13)                 | -0.05 (0.08)                    | -0.11 (0.11)                | -0.02 (0.27)                           | 0.05              |
| C56:10 TAG                                                                              | 0.25 (0.13)                 | -0.06 (0.08)                    | -0.15 (0.11)                | 0.38 (0.27)                            | 0.06              |
| C54:8 TAG                                                                               | 0.24 (0.13)                 | -0.03 (0.08)                    | -0.16 (0.11)                | 0.25 (0.27)                            | 0.06              |
| C54:6 TAG                                                                               | 0.25 (0.13)                 | -0.04 (0.09)                    | -0.12 (0.11)                | 0.06 (0.27)                            | 0.08              |
| C50:6 TAG                                                                               | 0.25 (0.13)                 | -0.05 (0.09)                    | -0.12 (0.11)                | 0.15 (0.27)                            | 0.09              |
| C58:8 TAG                                                                               | 0.25 (0.13)                 | -0.06 (0.09)                    | -0.10 (0.11)                | 0.11 (0.27)                            | 0.09              |
| C54:7 TAG                                                                               | 0.22 (0.13)                 | -0.03 (0.09)                    | -0.14 (0.11)                | 0.18 (0.27)                            | 0.11              |
| C56:8 TAG                                                                               | 0.22 (0.13)                 | -0.03 (0.09)                    | -0.12 (0.11)                | 0.08 (0.27)                            | 0.15              |
| C48:5 TAG                                                                               | 0.20 (0.13)                 | -0.06 (0.09)                    | -0.04 (0.11)                | -0.04 (0.27)                           | 0.24              |
| C46:4 TAG                                                                               | 0.17 (0.13)                 | -0.04 (0.09)                    | -0.04 (0.11)                | -0.05 (0.27)                           | 0.37              |
| C50:5 TAG                                                                               | 0.14 (0.13)                 | -0.02 (0.09)                    | -0.08 (0.11)                | 0.09 (0.27)                            | 0.41              |
| C58:7 TAG                                                                               | 0.11 (0.13)                 | -0.03 (0.09)                    | -0.06 (0.11)                | 0.15 (0.27)                            | 0.59              |
| C48:4 TAG                                                                               | 0.07 (0.13)                 | -0.02 (0.09)                    | -0.007 (0.11)               | -0.04 (0.27)                           | 0.83              |
| Triacylglycerol (TAG) that do <i>not</i> consist mostly of polyunsaturated fatty acids: |                             |                                 |                             |                                        |                   |
| C56:6 TAG                                                                               | 0.25 (0.13)                 | -0.04 (0.09)                    | -0.12 (0.11)                | 0.07 (0.27)                            | 0.08              |
| C52:6 TAG                                                                               | 0.19 (0.13)                 | -0.03 (0.09)                    | -0.11 (0.11)                | 0.14 (0.27)                            | 0.21              |
| C56:1 TAG                                                                               | 0.14 (0.13)                 | 0.02 (0.09)                     | -0.14 (0.11)                | 0.02 (0.27)                            | 0.22              |
| C52:5 TAG                                                                               | 0.13 (0.12)                 | 0.005 (0.09)                    | -0.10 (0.11)                | 0.04 (0.28)                            | 0.32              |
| C54:5 TAG                                                                               | 0.13 (0.14)                 | 0.02 (0.09)                     | -0.11 (0.09)                | -0.08 (0.31)                           | 0.33              |
| C56:5 TAG                                                                               | 0.18 (0.13)                 | -0.04 (0.09)                    | -0.03 (0.11)                | -0.2 (0.27)                            | 0.36              |
| C58:6 TAG                                                                               | 0.15 (0.12)                 | -0.02 (0.08)                    | -0.07 (0.12)                | -0.04 (0.27)                           | 0.39              |
| C56:4 TAG                                                                               | 0.14 (0.13)                 | 0.02 (0.09)                     | -0.09 (0.11)                | -0.22 (0.27)                           | 0.39              |
| C46:1 TAG                                                                               | -0.10 (0.13)                | -0.01 (0.09)                    | 0.12 (0.11)                 | -0.12 (0.27)                           | 0.41              |
| C52:4 TAG                                                                               | 0.10 (0.13)                 | 0.03 (0.09)                     | -0.09 (0.09)                | -0.17 (0.27)                           | 0.43              |
| C46:0 TAG                                                                               | -0.10 (0.13)                | -0.0021 (0.09)                  | 0.10 (0.11)                 | -0.18 (0.27)                           | 0.49              |
| C44:0 TAG                                                                               | -0.09 (0.13)                | 0.005 (0.09)                    | 0.10 (0.11)                 | -0.26 (0.27)                           | 0.54              |
| C56:2 TAG                                                                               | 0.10 (0.13)                 | 0.00003 (0.09)                  | -0.07 (0.11)                | 0.01 (0.27)                            | 0.56              |
| C52:0 TAG                                                                               | 0.12 (0.13)                 | -0.02 (0.09)                    | -0.03 (0.11)                | -0.12 (0.27)                           | 0.58              |
| C48:2 TAG                                                                               | -0.10 (0.15)                | 0.005 (0.08)                    | 0.08 (0.11)                 | -0.12 (0.26)                           | 0.61              |
| C54:4 TAG                                                                               | 0.08 (0.13)                 | 0.03 (0.09)                     | -0.08 (0.11)                | -0.09 (0.27)                           | 0.62              |
| C48:1 TAG                                                                               | -0.10 (0.15)                | 0.01 (0.08)                     | 0.08 (0.11)                 | -0.19 (0.26)                           | 0.63              |
| C46:2 TAG                                                                               | -0.08 (0.13)                | 0.001 (0.09)                    | 0.08 (0.11)                 | -0.11 (0.27)                           | 0.64              |
| C56:3 TAG                                                                               | 0.09 (0.13)                 | 0.0001 (0.09)                   | -0.06 (0.11)                | -0.02 (0.27)                           | 0.65              |
| C54:1 TAG                                                                               | 0.11 (0.13)                 | -0.02 (0.09)                    | -0.03 (0.11)                | -0.05 (0.27)                           | 0.66              |
| C44:1 TAG                                                                               | -0.05 (0.13)                | -0.02 (0.09)                    | 0.09 (0.11)                 | -0.14 (0.27)                           | 0.66              |

| Mean (standard error)                      | APOE genotype categories    |                                 |                             |                                        | Overall p-value** |
|--------------------------------------------|-----------------------------|---------------------------------|-----------------------------|----------------------------------------|-------------------|
|                                            | $\epsilon 2$ carrier (n=58) | $\epsilon 3$ homozygous (n=137) | $\epsilon 4$ carrier (n=83) | $\epsilon 2\epsilon 4$ carriers (n=14) |                   |
| Metabolites:                               |                             |                                 |                             |                                        |                   |
| C52:3 TAG                                  | -0.05 (0.13)                | 0.05 (0.09)                     | -0.01 (0.11)                | -0.18 (0.27)                           | 0.80              |
| C50:4 TAG                                  | 0.06 (0.13)                 | 0.008 (0.09)                    | -0.05 (0.11)                | -0.03 (0.27)                           | 0.80              |
| C42:0 TAG                                  | -0.03 (0.13)                | -0.008 (0.09)                   | 0.06 (0.11)                 | -0.15 (0.27)                           | 0.84              |
| C52:2 TAG                                  | -0.04 (0.13)                | 0.04 (0.09)                     | 0.01 (0.11)                 | -0.26 (0.27)                           | 0.89              |
| C48:3 TAG                                  | -0.03 (0.13)                | -0.006 (0.09)                   | 0.04 (0.11)                 | -0.07 (0.27)                           | 0.89              |
| C44:2 TAG                                  | -0.006 (0.13)               | -0.01 (0.09)                    | 0.04 (0.11)                 | -0.11 (0.27)                           | 0.93              |
| C48:0 TAG                                  | -0.03 (0.13)                | 0.03 (0.09)                     | 0.008 (0.11)                | -0.16 (0.27)                           | 0.93              |
| C46:3 TAG                                  | 0.03 (0.13)                 | -0.02 (0.09)                    | 0.02 (0.11)                 | -0.11 (0.27)                           | 0.94              |
| C50:2 TAG                                  | 0.04 (0.13)                 | 0.0001 (0.09)                   | -0.009 (0.11)               | -0.12 (0.27)                           | 0.95              |
| C54:2 TAG                                  | 0.04 (0.13)                 | -0.0003 (0.09)                  | -0.005 (0.11)               | -0.13 (0.27)                           | 0.96              |
| C50:1 TAG                                  | -0.02 (0.15)                | 0.02 (0.08)                     | 0.006 (0.11)                | -0.16 (0.32)                           | 0.97              |
| C50:3 TAG                                  | -0.01 (0.13)                | 0.02 (0.09)                     | -0.008 (0.11)               | -0.09 (0.27)                           | 0.97              |
| C50:0 TAG                                  | 0.03 (0.13)                 | 0.01 (0.09)                     | -0.007 (0.11)               | -0.21 (0.27)                           | 0.98              |
| C52:1 TAG                                  | 0.001 (0.13)                | 0.02 (0.09)                     | 0.0006 (0.11)               | -0.21 (0.27)                           | 0.99              |
| C54:3 TAG                                  | -0.003 (0.13)               | 0.009 (0.09)                    | 0.009 (0.11)                | -0.12 (0.27)                           | 0.997             |
| Phosphatidylethanolamine (PE) plasmalogen: |                             |                                 |                             |                                        |                   |
| C36:4 PE plasmalogen                       | 0.29 (0.13)                 | 0.005 (0.08)                    | -0.22 (0.11)                | 0.09 (0.26)                            | 0.01              |
| C36:2 PE plasmalogen                       | 0.30 (0.13)                 | -0.04 (0.08)                    | -0.18 (0.11)                | 0.20 (0.26)                            | 0.02              |
| C36:3 PE plasmalogen                       | 0.25 (0.13)                 | -0.007 (0.08)                   | -0.21 (0.11)                | 0.27 (0.26)                            | 0.03              |
| C38:5 PE plasmalogen                       | 0.28 (0.13)                 | -0.05 (0.08)                    | -0.14 (0.11)                | 0.15 (0.27)                            | 0.04              |
| C34:3 PE plasmalogen                       | 0.20 (0.13)                 | -0.0004 (0.09)                  | -0.18 (0.11)                | 0.27 (0.27)                            | 0.09              |
| C38:6 PE plasmalogen                       | 0.21 (0.13)                 | -0.04 (0.09)                    | -0.12 (0.11)                | 0.17 (0.27)                            | 0.14              |
| C36:5 PE plasmalogen                       | 0.19 (0.13)                 | -0.04 (0.09)                    | -0.09 (0.11)                | 0.16 (0.27)                            | 0.23              |
| C38:3 PE plasmalogen                       | 0.04 (0.12)                 | 0.05 (0.08)                     | -0.15 (0.13)                | 0.23 (0.22)                            | 0.43              |
| C40:7 PE plasmalogen                       | 0.06 (0.13)                 | 0.02 (0.09)                     | -0.11 (0.11)                | 0.12 (0.27)                            | 0.54              |
| C34:2 PE plasmalogen                       | 0.07 (0.13)                 | -0.01 (0.09)                    | -0.08 (0.11)                | 0.31 (0.27)                            | 0.69              |
| C38:7 PE plasmalogen                       | 0.04 (0.13)                 | 0.03 (0.09)                     | -0.08 (0.11)                | -0.003 (0.27)                          | 0.69              |
| C42:11 PE plasmalogen                      | 0.01 (0.13)                 | 0.01 (0.09)                     | -0.06 (0.11)                | 0.16 (0.27)                            | 0.87              |
| C44:13 PE plasmalogen                      | -0.03 (0.13)                | 0.03 (0.09)                     | -0.04 (0.11)                | 0.06 (0.27)                            | 0.88              |
| Lysophosphatidylethanolamine (LPE):        |                             |                                 |                             |                                        |                   |
| C22:6 LPE                                  | -0.12 (0.15)                | -0.08 (0.09)                    | 0.19 (0.09)                 | 0.21 (0.23)                            | 0.06              |
| C16:0 LPE                                  | 0.16 (0.13)                 | -0.17 (0.08)                    | 0.10 (0.11)                 | 0.40 (0.26)                            | 0.06              |
| C18:0 LPE                                  | 0.13 (0.13)                 | -0.16 (0.08)                    | 0.10 (0.11)                 | 0.45 (0.26)                            | 0.07              |
| C20:4 LPE                                  | 0.06 (0.13)                 | -0.14 (0.08)                    | 0.12 (0.11)                 | 0.42 (0.27)                            | 0.13              |
| C18:1 LPE                                  | 0.06 (0.13)                 | -0.09 (0.09)                    | 0.04 (0.11)                 | 0.36 (0.27)                            | 0.51              |
| C18:2 LPE                                  | 0.04 (0.13)                 | -0.09 (0.09)                    | 0.05 (0.11)                 | 0.40 (0.27)                            | 0.51              |
| Phosphatidylserine (PS) plasmalogen:       |                             |                                 |                             |                                        |                   |
| C36:2 PS plasmalogen                       | -0.17 (0.13)                | 0.11 (0.09)                     | -0.06 (0.11)                | 0.002 (0.27)                           | 0.17              |
| C36:1 PS plasmalogen                       | -0.19 (0.13)                | 0.07 (0.09)                     | -0.007 (0.11)               | 0.20 (0.27)                            | 0.25              |
| Sphingomyelin (SM):                        |                             |                                 |                             |                                        |                   |
| C24:0 SM                                   | -0.30 (0.13)                | 0.12 (0.08)                     | 0.001 (0.11)                | 0.06 (0.27)                            | 0.03              |
| C22:0 SM                                   | -0.24 (0.13)                | 0.10 (0.09)                     | 0.02 (0.11)                 | -0.07 (0.27)                           | 0.09              |
| C20:0 SM                                   | -0.24 (0.13)                | 0.07 (0.09)                     | 0.04 (0.11)                 | 0.10 (0.27)                            | 0.12              |
| C22:1 SM                                   | -0.21 (0.13)                | 0.06 (0.09)                     | 0.05 (0.11)                 | 0.01 (0.27)                            | 0.20              |
| C18:0 SM                                   | -0.18 (0.13)                | -0.003 (0.09)                   | 0.11 (0.11)                 | 0.12 (0.27)                            | 0.25              |
| C14:0 SM                                   | -0.19 (0.13)                | 0.06 (0.09)                     | 0.02 (0.11)                 | 0.08 (0.27)                            | 0.26              |
| C16:1 SM                                   | -0.17 (0.13)                | 0.04 (0.09)                     | -0.003 (0.11)               | 0.29 (0.27)                            | 0.39              |
| C24:1 SM                                   | -0.14 (0.13)                | 0.03 (0.09)                     | 0.04 (0.11)                 | 0.05 (0.27)                            | 0.49              |
| C16:0 SM                                   | -0.13 (0.13)                | 0.03 (0.09)                     | -0.003 (0.11)               | 0.26 (0.27)                            | 0.62              |
| C18:1 SM                                   | -0.09 (0.13)                | -0.01 (0.09)                    | 0.07 (0.11)                 | 0.04 (0.27)                            | 0.64              |
| C18:2 SM                                   | 0.0003 (0.13)               | 0.02 (0.09)                     | -0.006 (0.11)               | -0.13 (0.27)                           | 0.99              |
| Phosphorylcholine (PC) plasmalogen:        |                             |                                 |                             |                                        |                   |
| C36:3 PC plasmalogen                       | 0.11 (0.13)                 | 0.05 (0.08)                     | -0.22 (0.11)                | 0.33 (0.27)                            | 0.08              |
| C40:7 PC plasmalogen                       | 0.06 (0.13)                 | 0.06 (0.09)                     | -0.19 (0.11)                | 0.25 (0.27)                            | 0.16              |
| C36:2 PC plasmalogen                       | 0.08 (0.13)                 | 0.05 (0.09)                     | -0.18 (0.11)                | 0.26 (0.27)                            | 0.19              |
| C38:6 PC plasmalogen                       | 0.08 (0.13)                 | 0.04 (0.09)                     | -0.18 (0.11)                | 0.32 (0.27)                            | 0.22              |
| C34:3 PC plasmalogen                       | 0.009 (0.13)                | 0.06 (0.09)                     | -0.16 (0.11)                | 0.36 (0.27)                            | 0.28              |
| C38:7 PC plasmalogen                       | -0.01 (0.13)                | 0.06 (0.09)                     | -0.13 (0.11)                | 0.22 (0.27)                            | 0.37              |
| C34:2 PC plasmalogen                       | -0.009 (0.13)               | 0.04 (0.09)                     | -0.14 (0.11)                | 0.43 (0.27)                            | 0.43              |
| C36:5 PC plasmalogen-B                     | 0.10 (0.13)                 | -0.02 (0.09)                    | -0.11 (0.11)                | 0.47 (0.27)                            | 0.49              |
| C36:4 PC plasmalogen                       | 0.11 (0.13)                 | -0.05 (0.09)                    | -0.07 (0.11)                | 0.41 (0.27)                            | 0.51              |
| C38:4 PC plasmalogen                       | 0.10 (0.13)                 | -0.006 (0.09)                   | -0.09 (0.11)                | 0.23 (0.27)                            | 0.54              |

| Mean (standard error)          | APOE genotype categories    |                                 |                             |                                        | Overall p-value** |
|--------------------------------|-----------------------------|---------------------------------|-----------------------------|----------------------------------------|-------------------|
|                                | $\epsilon 2$ carrier (n=58) | $\epsilon 3$ homozygous (n=137) | $\epsilon 4$ carrier (n=83) | $\epsilon 2\epsilon 4$ carriers (n=14) |                   |
| Metabolites:                   |                             |                                 |                             |                                        |                   |
| C34:1 PC plasmalogen-A         | -0.07 (0.13)                | 0.05 (0.09)                     | -0.09 (0.11)                | 0.38 (0.27)                            | 0.56              |
| C36:5 PC plasmalogen-A         | 0.08 (0.13)                 | -0.04 (0.09)                    | -0.06 (0.11)                | 0.37 (0.27)                            | 0.69              |
| C36:1 PC plasmalogen           | 0.001 (0.13)                | 0.02 (0.09)                     | -0.05 (0.11)                | 0.05 (0.27)                            | 0.88              |
| Phosphorylcholine (PC):        |                             |                                 |                             |                                        |                   |
| C40:6 PC                       | -0.21 (0.13)                | 0.12 (0.09)                     | -0.06 (0.11)                | 0.07 (0.27)                            | 0.10              |
| C40:9 PC                       | -0.22 (0.13)                | 0.05 (0.09)                     | 0.09 (0.11)                 | -0.07 (0.27)                           | 0.15              |
| C38:3 PC                       | -0.17 (0.13)                | 0.11 (0.09)                     | -0.08 (0.11)                | 0.10 (0.27)                            | 0.17              |
| C34:2 PC                       | -0.20 (0.13)                | 0.08 (0.09)                     | 0.001 (0.11)                | 0.007 (0.27)                           | 0.21              |
| C38:6 PC                       | -0.20 (0.13)                | 0.04 (0.09)                     | 0.08 (0.11)                 | -0.04 (0.27)                           | 0.21              |
| C30:0 PC                       | -0.20 (0.13)                | 0.04 (0.09)                     | 0.08 (0.11)                 | -0.04 (0.27)                           | 0.21              |
| C36:2 PC                       | -0.13 (0.13)                | 0.08 (0.09)                     | -0.11 (0.11)                | 0.37 (0.27)                            | 0.26              |
| C34:0 PC                       | -0.15 (0.13)                | -0.02 (0.09)                    | 0.10 (0.11)                 | 0.24 (0.27)                            | 0.31              |
| C38:2 PC                       | -0.15 (0.13)                | 0.08 (0.09)                     | -0.05 (0.11)                | 0.16 (0.27)                            | 0.32              |
| C32:2 PC                       | -0.17 (0.13)                | 0.05 (0.09)                     | 0.02 (0.11)                 | 0.09 (0.27)                            | 0.38              |
| C38:4 PC                       | -0.11 (0.13)                | 0.05 (0.09)                     | -0.08 (0.11)                | 0.44 (0.27)                            | 0.46              |
| C34:1 PC                       | -0.14 (0.13)                | 0.01 (0.09)                     | 0.06 (0.11)                 | 0.12 (0.27)                            | 0.50              |
| C36:3 PC                       | -0.10 (0.13)                | 0.06 (0.09)                     | -0.04 (0.11)                | 0.11 (0.27)                            | 0.56              |
| C34:3 PC                       | -0.11 (0.13)                | 0.05 (0.09)                     | -0.06 (0.11)                | 0.34 (0.27)                            | 0.57              |
| C32:0 PC                       | -0.13 (0.13)                | 0.03 (0.09)                     | 0.003 (0.11)                | 0.27 (0.27)                            | 0.59              |
| C34:4 PC                       | -0.11 (0.13)                | 0.03 (0.09)                     | 0.003 (0.11)                | 0.18 (0.27)                            | 0.68              |
| C36:0 PC                       | -0.05 (0.13)                | -0.04 (0.09)                    | 0.06 (0.11)                 | 0.21 (0.27)                            | 0.71              |
| C40:10 PC                      | -0.10 (0.13)                | 0.03 (0.09)                     | -0.004 (0.11)               | 0.14 (0.27)                            | 0.74              |
| C36:1 PC                       | -0.09 (0.13)                | 0.02 (0.09)                     | -0.02 (0.11)                | 0.24 (0.27)                            | 0.78              |
| C30:1 PC                       | -0.09 (0.13)                | 0.01 (0.09)                     | 0.02 (0.11)                 | 0.12 (0.27)                            | 0.79              |
| C36:4 PC-B                     | -0.06 (0.10)                | 0.005 (0.09)                    | 0.0009 (0.12)               | 0.18 (0.26)                            | 0.89              |
| C36:4 PC-A                     | -0.01 (0.13)                | 0.01 (0.09)                     | -0.04 (0.11)                | 0.18 (0.27)                            | 0.93              |
| C32:1 PC                       | -0.01 (0.13)                | -0.0012 (0.09)                  | -0.006 (0.11)               | 0.09 (0.27)                            | 0.998             |
| Lysophosphatidylcholine (LPC): |                             |                                 |                             |                                        |                   |
| C20:4 LPC                      | 0.12 (0.10)                 | -0.09 (0.09)                    | 0.002 (0.11)                | 0.38 (0.25)                            | 0.33              |
| C16:0 LPC                      | 0.03 (0.13)                 | -0.10 (0.09)                    | 0.08 (0.11)                 | 0.40 (0.27)                            | 0.42              |
| C16:1 LPC                      | 0.11 (0.13)                 | -0.09 (0.09)                    | 0.01 (0.11)                 | 0.32 (0.27)                            | 0.44              |
| C18:0 LPC                      | -0.001 (0.13)               | -0.10 (0.08)                    | 0.07 (0.11)                 | 0.61 (0.27)                            | 0.44              |
| C18:1 LPC                      | 0.05 (0.13)                 | -0.10 (0.09)                    | 0.06 (0.11)                 | 0.37 (0.27)                            | 0.45              |
| C20:3 LPC                      | 0.003 (0.13)                | -0.09 (0.09)                    | 0.07 (0.11)                 | 0.40 (0.27)                            | 0.50              |
| C18:2 LPC                      | 0.09 (0.13)                 | -0.06 (0.09)                    | -0.02 (0.11)                | 0.35 (0.27)                            | 0.62              |
| C14:0 LPC                      | -0.09 (0.13)                | -0.0003 (0.09)                  | 0.05 (0.11)                 | 0.10 (0.27)                            | 0.71              |
| C22:6 LPC                      | -0.02 (0.13)                | -0.03 (0.09)                    | 0.05 (0.11)                 | 0.15 (0.27)                            | 0.84              |
| C20:5 LPC                      | 0.05 (0.13)                 | -0.04 (0.09)                    | -0.03 (0.11)                | 0.32 (0.27)                            | 0.85              |
| Phosphatidylinositol (PI):     |                             |                                 |                             |                                        |                   |
| C34:2 PI                       | -0.20 (0.13)                | 0.03 (0.09)                     | 0.12 (0.11)                 | -0.21 (0.27)                           | 0.16              |
| C34:0 PI                       | -0.08 (0.13)                | 0.07 (0.09)                     | -0.11 (0.11)                | 0.26 (0.27)                            | 0.37              |
| C32:1 PI                       | -0.08 (0.13)                | 0.03 (0.09)                     | 0.02 (0.11)                 | -0.10 (0.27)                           | 0.78              |
| C38:4 PI                       | -0.001 (0.13)               | 0.005 (0.09)                    | -0.05 (0.11)                | 0.27 (0.27)                            | 0.91              |
| C32:2 PI                       | -0.05 (0.13)                | 0.006 (0.09)                    | 0.009 (0.11)                | 0.08 (0.27)                            | 0.93              |
| Acylcarnitines:                |                             |                                 |                             |                                        |                   |
| C10:2 carnitine                | 0.10 (0.13)                 | 0.08 (0.09)                     | -0.18 (0.11)                | -0.17 (0.27)                           | 0.12              |
| C2 carnitine                   | 0.05 (0.13)                 | 0.06 (0.09)                     | -0.15 (0.11)                | 0.06 (0.27)                            | 0.28              |
| C14:2 carnitine                | 0.12 (0.13)                 | 0.04 (0.09)                     | -0.13 (0.11)                | -0.07 (0.27)                           | 0.29              |
| C5 carnitine                   | 0.03 (0.13)                 | 0.08 (0.09)                     | -0.12 (0.11)                | -0.18 (0.27)                           | 0.33              |
| C6 carnitine                   | -0.0004 (0.13)              | 0.09 (0.09)                     | -0.12 (0.11)                | -0.13 (0.27)                           | 0.34              |
| C26 carnitine                  | -0.13 (0.13)                | 0.07 (0.09)                     | -0.08 (0.11)                | 0.33 (0.27)                            | 0.37              |
| C18 carnitine                  | -0.12 (0.13)                | -0.04 (0.09)                    | 0.11 (0.11)                 | 0.24 (0.27)                            | 0.38              |
| C3 carnitine                   | 0.06 (0.16)                 | 0.06 (0.07)                     | -0.13 (0.12)                | -0.12 (0.20)                           | 0.41              |
| C4 carnitine                   | 0.07 (0.13)                 | 0.02 (0.09)                     | -0.12 (0.11)                | 0.20 (0.27)                            | 0.45              |
| C12:1 carnitine                | 0.11 (0.13)                 | 0.03 (0.09)                     | -0.09 (0.11)                | -0.20 (0.27)                           | 0.46              |
| C5:1 carnitine                 | -0.06 (0.13)                | 0.09 (0.09)                     | -0.04 (0.11)                | -0.44 (0.27)                           | 0.48              |
| C16 carnitine                  | -0.09 (0.13)                | -0.04 (0.09)                    | 0.10 (0.11)                 | 0.16 (0.27)                            | 0.49              |
| C16-OH carnitine               | 0.10 (0.13)                 | 0.01 (0.09)                     | -0.10 (0.11)                | 0.06 (0.27)                            | 0.49              |
| C20:4 carnitine                | -0.15 (0.13)                | 0.02 (0.09)                     | 0.03 (0.11)                 | 0.26 (0.27)                            | 0.50              |
| C18:1 carnitine                | -0.13 (0.13)                | 0.004 (0.09)                    | 0.06 (0.11)                 | 0.13 (0.27)                            | 0.52              |
| C18:2 carnitine                | -0.06 (0.13)                | 0.05 (0.09)                     | -0.06 (0.11)                | 0.12 (0.27)                            | 0.66              |
| C8 carnitine                   | 0.09 (0.13)                 | 0.04 (0.09)                     | -0.05 (0.11)                | -0.45 (0.27)                           | 0.67              |
| C3-DC-CH3 carnitine            | 0.11 (0.13)                 | -0.003 (0.09)                   | -0.04 (0.11)                | -0.20 (0.27)                           | 0.69              |

| Mean (standard error)          | APOE genotype categories    |                                 |                             |                                        | Overall p-value** |
|--------------------------------|-----------------------------|---------------------------------|-----------------------------|----------------------------------------|-------------------|
|                                | $\epsilon 2$ carrier (n=58) | $\epsilon 3$ homozygous (n=137) | $\epsilon 4$ carrier (n=83) | $\epsilon 2\epsilon 4$ carriers (n=14) |                   |
| Metabolites:                   |                             |                                 |                             |                                        |                   |
| C10 carnitine                  | 0.09 (0.13)                 | 0.04 (0.09)                     | -0.05 (0.11)                | -0.42 (0.27)                           | 0.71              |
| C4-OH carnitine                | 0.08 (0.13)                 | 0.009 (0.09)                    | -0.05 (0.11)                | -0.12 (0.27)                           | 0.73              |
| C7 carnitine                   | 0.03 (0.13)                 | 0.05 (0.09)                     | -0.06 (0.11)                | -0.28 (0.27)                           | 0.73              |
| C12 carnitine                  | 0.04 (0.13)                 | 0.04 (0.09)                     | -0.06 (0.11)                | -0.20 (0.27)                           | 0.74              |
| C14:1 carnitine                | 0.06 (0.13)                 | 0.02 (0.09)                     | -0.06 (0.11)                | -0.05 (0.27)                           | 0.75              |
| C18:1-OH carnitine             | -0.02 (0.13)                | -0.04 (0.09)                    | 0.06 (0.11)                 | 0.12 (0.27)                            | 0.79              |
| C9 carnitine                   | 0.05 (0.12)                 | 0.04 (0.08)                     | -0.03 (0.13)                | -0.41 (0.29)                           | 0.86              |
| C14 carnitine                  | -0.05 (0.13)                | 0.03 (0.09)                     | -0.01 (0.11)                | 0.03 (0.27)                            | 0.87              |
| C5-DC carnitine                | 0.02 (0.13)                 | 0.01 (0.09)                     | -0.005 (0.11)               | -0.16 (0.27)                           | 0.99              |
| Phosphatidylethanolamine (PE): |                             |                                 |                             |                                        |                   |
| C36:0 PE                       | -0.17 (0.13)                | -0.006 (0.09)                   | 0.13 (0.11)                 | -0.03 (0.27)                           | 0.21              |
| C34:0 PE                       | -0.14 (0.13)                | 0.03 (0.09)                     | 0.10 (0.11)                 | -0.32 (0.27)                           | 0.35              |
| C36:4 PE                       | 0.16 (0.13)                 | -0.05 (0.09)                    | -0.002 (0.11)               | -0.13 (0.27)                           | 0.38              |
| C38:2 PE                       | -0.15 (0.13)                | 0.07 (0.09)                     | -0.01 (0.11)                | 0.02 (0.27)                            | 0.39              |
| C38:5 PE                       | 0.15 (0.13)                 | -0.05 (0.09)                    | -0.04 (0.11)                | 0.06 (0.27)                            | 0.43              |
| C34:2 PE                       | 0.11 (0.13)                 | 0.04 (0.09)                     | -0.10 (0.11)                | -0.24 (0.27)                           | 0.45              |
| C36:3 PE                       | 0.12 (0.13)                 | -0.005 (0.09)                   | -0.07 (0.11)                | 0.006 (0.27)                           | 0.53              |
| C36:2 PE                       | 0.07 (0.13)                 | 0.02 (0.09)                     | -0.07 (0.11)                | -0.07 (0.27)                           | 0.71              |
| C36:1 PE                       | 0.08 (0.13)                 | -0.01 (0.09)                    | -0.04 (0.11)                | 0.05 (0.27)                            | 0.76              |
| C38:4 PE                       | 0.08 (0.13)                 | -0.03 (0.09)                    | -0.01 (0.11)                | 0.03 (0.27)                            | 0.76              |
| C40:6 PE                       | -0.02 (0.13)                | 0.05 (0.09)                     | -0.02 (0.11)                | -0.35 (0.27)                           | 0.83              |
| C38:6 PE                       | 0.04 (0.13)                 | 0.009 (0.09)                    | -0.01 (0.11)                | -0.18 (0.27)                           | 0.96              |
| Bile acids:                    |                             |                                 |                             |                                        |                   |
| Glycodeoxycholate              | -0.03 (0.13)                | -0.007 (0.09)                   | 0.12 (0.11)                 | -0.52 (0.27)                           | 0.58              |
| Chenodeoxycholate              | 0.07 (0.13)                 | -0.02 (0.09)                    | 0.04 (0.11)                 | -0.32 (0.27)                           | 0.83              |
| Glycocholate                   | 0.02 (0.13)                 | 0.02 (0.09)                     | 0.01 (0.11)                 | -0.31 (0.27)                           | 0.998             |
| Diacylglycerol (DAG):          |                             |                                 |                             |                                        |                   |
| C38:5 DAG                      | 0.26 (0.13)                 | -0.07 (0.09)                    | -0.09 (0.11)                | 0.14 (0.27)                            | 0.06              |
| C36:0 DAG                      | -0.09 (0.13)                | 0.12 (0.08)                     | -0.04 (0.11)                | -0.52 (0.27)                           | 0.31              |
| C38:4 DAG                      | 0.15 (0.13)                 | -0.006 (0.09)                   | -0.09 (0.11)                | -0.02 (0.27)                           | 0.37              |
| C34:3 DAG                      | 0.14 (0.13)                 | -0.0024 (0.09)                  | -0.08 (0.11)                | -0.08 (0.27)                           | 0.41              |
| C36:4 DAG                      | 0.11 (0.14)                 | 0.02 (0.09)                     | -0.09 (0.09)                | -0.12 (0.29)                           | 0.47              |
| C34:0 DAG                      | -0.007 (0.13)               | 0.07 (0.09)                     | -0.06 (0.11)                | -0.27 (0.27)                           | 0.62              |
| C34:2 DAG                      | 0.10 (0.13)                 | 0.007 (0.09)                    | -0.04 (0.11)                | -0.22 (0.27)                           | 0.71              |
| C32:2 DAG                      | 0.05 (0.13)                 | 0.03 (0.09)                     | -0.05 (0.11)                | -0.16 (0.27)                           | 0.82              |
| C30:0 DAG                      | -0.01 (0.13)                | -0.01 (0.09)                    | 0.06 (0.11)                 | -0.18 (0.27)                           | 0.87              |
| C32:1 DAG                      | 0.02 (0.13)                 | -0.02 (0.09)                    | 0.04 (0.11)                 | -0.11 (0.27)                           | 0.88              |
| C36:3 DAG                      | 0.05 (0.13)                 | 0.01 (0.09)                     | -0.03 (0.11)                | -0.14 (0.27)                           | 0.88              |
| C34:1 DAG                      | 0.02 (0.13)                 | 0.03 (0.09)                     | -0.03 (0.11)                | -0.14 (0.27)                           | 0.91              |
| C36:2 DAG                      | -0.03 (0.13)                | 0.01 (0.09)                     | 0.01 (0.11)                 | -0.09 (0.27)                           | 0.96              |
| C36:1 DAG                      | -0.008 (0.13)               | 0.02 (0.09)                     | -0.003 (0.11)               | -0.10 (0.27)                           | 0.98              |
| C32:0 DAG                      | -0.006 (0.13)               | 0.01 (0.09)                     | 0.007 (0.11)                | -0.14 (0.27)                           | 0.99              |
| Ceramide:                      |                             |                                 |                             |                                        |                   |
| C24:1 Ceramide (d18:1)         | 0.21 (0.13)                 | -0.09 (0.09)                    | -0.02 (0.11)                | 0.13 (0.27)                            | 0.16              |
| C24:0 Ceramide (d18:1)         | 0.05 (0.13)                 | 0.04 (0.09)                     | -0.10 (0.11)                | -0.03 (0.27)                           | 0.52              |
| C16:0 Ceramide (d18:1)         | -0.09 (0.13)                | 0.009 (0.09)                    | 0.09 (0.11)                 | -0.21 (0.27)                           | 0.57              |
| C22:0 Ceramide (d18:1)         | 0.01 (0.13)                 | 0.01 (0.09)                     | -0.03 (0.11)                | -0.003 (0.27)                          | 0.96              |
| Extra metabolites***:          |                             |                                 |                             |                                        |                   |
| Sphingosine                    | -0.23 (0.13)                | 0.18 (0.08)                     | -0.06 (0.11)                | -0.49 (0.26)                           | 0.02              |
| Free carnitine                 | 0.06 (0.13)                 | 0.12 (0.08)                     | -0.23 (0.11)                | -0.06 (0.27)                           | 0.04              |
| 3-methyladipate                | 0.21 (0.16)                 | -0.03 (0.08)                    | -0.10 (0.11)                | -0.006 (0.25)                          | 0.28              |
| Mevalonic acid                 | 0.11 (0.13)                 | -0.09 (0.09)                    | 0.07 (0.11)                 | -0.02 (0.27)                           | 0.32              |
| Alpha-glycerophosphocholine    | 0.13 (0.13)                 | -0.02 (0.09)                    | -0.08 (0.11)                | 0.12 (0.27)                            | 0.48              |
| Alpha-glycerophosphate         | 0.01 (0.13)                 | -0.02 (0.09)                    | 0.06 (0.11)                 | -0.18 (0.27)                           | 0.86              |
| C34:0 PS                       | -0.09 (0.13)                | -0.002 (0.09)                   | -0.02 (0.11)                | 0.47 (0.27)                            | 0.87              |
| Adipate                        | 0.02 (0.13)                 | -0.02 (0.09)                    | 0.03 (0.11)                 | -0.11 (0.27)                           | 0.94              |

\*Excluding n=14 participants with APOE genotype,  $\epsilon 2\epsilon 4$ .

\*\*Overall p-value from ANOVA, adjusting for unequal variances when necessary (i.e., when p-value<0.10 from Levene's Test for Homogeneity of Variance)

\*\*\*For lipid categories that did not contain enough metabolites for a factor analysis or if the first factor had an eigenvalue less than one, then we examined these metabolites individually.

Supplemental Table 4. Proportion of variance explained for each factor score

| <b>Factor scores:</b>                                                                        | <b>Proportion of variance explained</b> |
|----------------------------------------------------------------------------------------------|-----------------------------------------|
| Monoacylglycerol (MAG) score                                                                 | 2.0                                     |
| Cholesteryl ester (CE) score                                                                 | 5.5                                     |
| Triacylglycerol (TAG) that consist mostly of polyunsaturated fatty acids score               | 13.3                                    |
| PE plasmalogen score                                                                         | 7.0                                     |
| Lysophosphatidylethanolamine (LPE) score                                                     | 3.7                                     |
| PS plasmalogen score                                                                         | 1.3                                     |
| Sphingomyelin (SM) score                                                                     | 6.7                                     |
| PC plasmalogen score                                                                         | 6.8                                     |
| Phosphorylcholine (PC) score                                                                 | 10.6                                    |
| Lysophosphatidylcholine (LPC) score                                                          | 6.3                                     |
| Phosphatidylinositol (PI) score                                                              | 0.7                                     |
| Acylcarnitine score                                                                          | 10.4                                    |
| Phosphatidylethanolamine (PE) score                                                          | 6.7                                     |
| Bile acid score                                                                              | 1.7                                     |
| Diacylglycerol (DAG) score                                                                   | 9.9                                     |
| Triacylglycerol (TAG) that do <i>not</i> consist mostly of polyunsaturated fatty acids score | 21.4                                    |
| Ceramide score                                                                               | 2.2                                     |
